# Supplementary material for: A new inorganic–organic hybrid material Al-SBA-15-TPI/H6P2W18O62 catalyzed one-pot, three-component synthesis of 2H-indazolo[2,1-b]phthalazine-triones
Source: Royal Society of Chemistry journal article supplement (doi:10.1039/c4dt03504f), 2015-01-01
Supplement: c4dt03504f1.pdf [file c4dt03504f1.pdf]

### Electronic Supplementary Information

#### **A new inorganic-organic hybrid material Al-SBA-15-TPI/H<sub>6</sub>P<sub>2</sub>W<sub>18</sub>O<sub>62</sub> catalyzed one-pot, three-component synthesis of 2H-Indazolo[2,1-b]phthalazine-triones**

*R. Tayebee<sup>a</sup>, M. M. Amini<sup>b</sup>, S. Pouyamanesh<sup>a</sup>, A. Aliakbari<sup>b</sup>*

<sup>a</sup>*Department of Chemistry, School of Sciences, Hakim Sabzevari University, Sabzevar 96179-76487, Iran*

<sup>b</sup>*Department of Chemistry, Shahid Beheshti University, G.C., Tehran 1983963113, Iran*

#### **List of figures:**

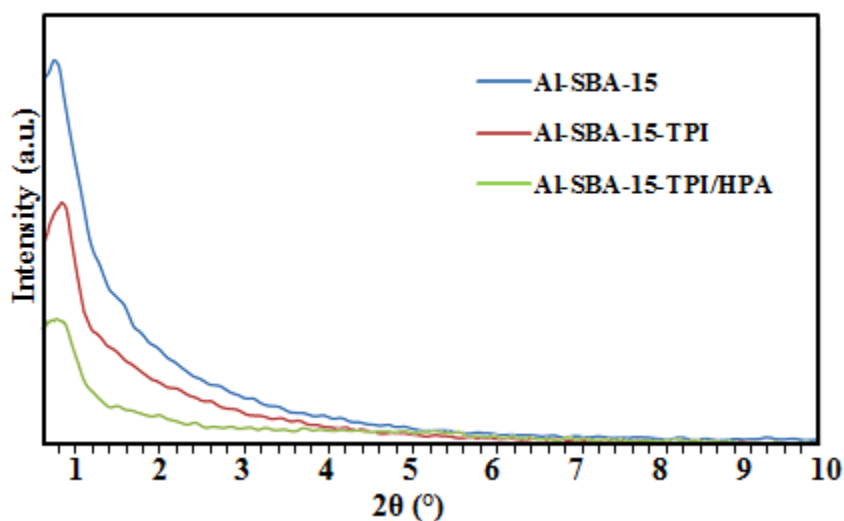

(a)

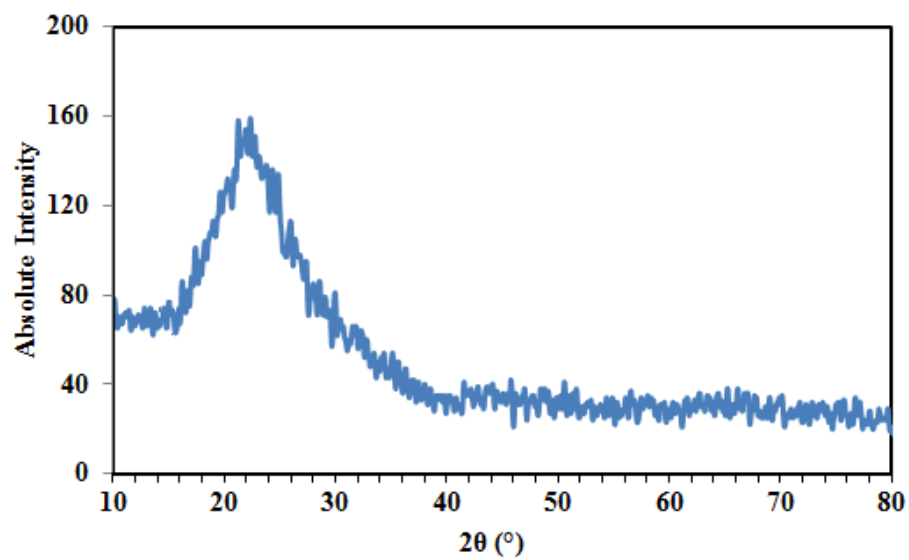

(b)

**Fig. S1** (a) Low angle patterns of Al-SBA-15, Al-SBA-15-TPI and Al-SBA-15-TPI/HPA. (b) High angle XRD pattern of  $\text{H}_6\text{P}_2\text{W}_{18}\text{O}_{62}$  anchored on Al-SBA-15-TPI.

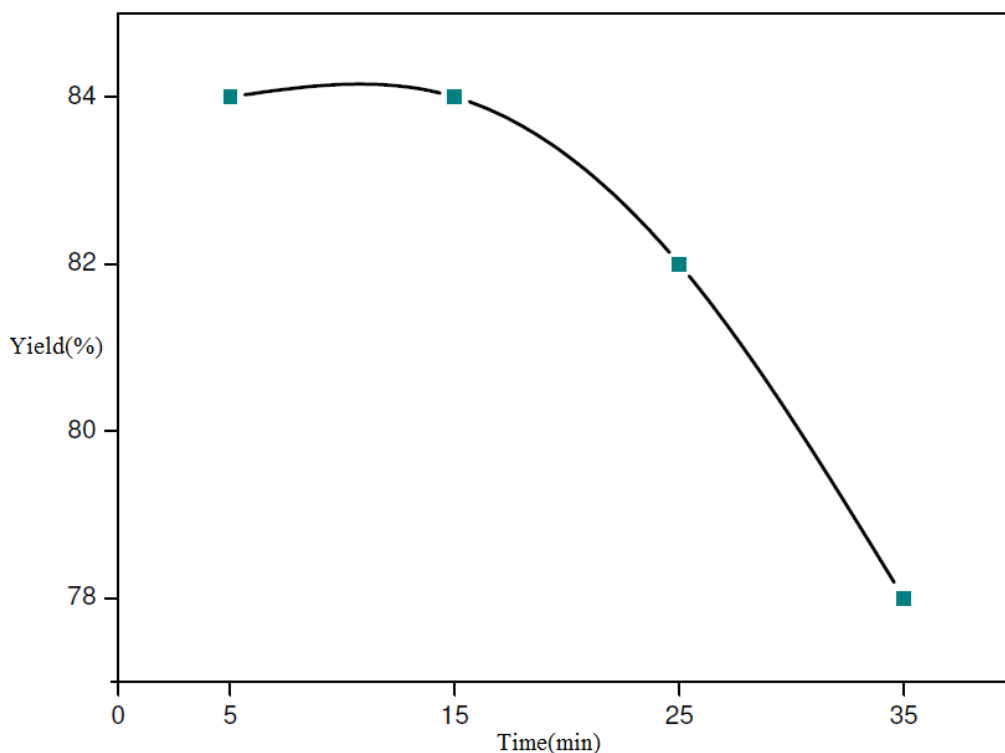

**Fig. S2** Effect of the reaction time on the condensation of phthalhydrazide, benzaldehyde, and dimedone catalyzed by  $\text{H}_6\text{P}_2\text{W}_{18}\text{O}_{62}$  under solvent free conditions.

### Synthesis of Al-SBA-15

Incorporation of aluminium (15 mol%) to the siliceous framework of SBA-15 was performed in situ during the synthesis process as described in the supporting information. Mesoporous Al-SBA-15 was synthesized by using triblock poly(ethyleneoxide)-poly (propyleneoxide)-poly(ethylene oxide) copolymer (pluronic P123) as the structure directing agent, tetraethyl orthosilicate (TEOS) as a silica source, and aluminium tri-*sec*-butoxide as the aluminium source. In a typical process, 12.0 g of P123 was dissolved completely in 275 g of deionized water until a transparent solution obtained. Concentrated HCl (60 ml) was added to the solution while stirring. Then, 27.5 g TEOS was mixed in 100 g of deionized water and was added drop wise to the above solution. After aging the solution at 40 °C for 10 min, calculated amount of aluminium tri-*sec*-butoxide was introduced into the mixture in order to obtain an Al/Si mole ratio of 0.15. Finally, the resulting mixture was stirred for 2 h in the same temperature and then transferred to a

teflon-sealed autoclave and heated to 100 °C for 48 h. The resultant precipitate was filtered, washed, neutralized, and dried at room temperature overnight. To remove surfactant, the solid was heated from room temperature to 540 °C with the rate of 3 °C/min and then was kept at 540 °C for 6 h. The synthesis of Al-SBA-15 was confirmed by FT-IR and low-angle X-ray powder diffraction.

### **Synthesis of pyridine-functionalized Al-SBA-15-TPI**

N-(3-(triethoxysilyl)propyl)isonicotinamide (TPI) was synthesized according to the previously reported procedure<sup>1</sup> and characterized by <sup>1</sup>HNMR. The synthesized Al-SBA-15 mesopore was functionalized with TPI, similar to the general procedure for functionalization<sup>2</sup>. In a typical reaction, 1.0 g of Al-SBA-15 was suspended in 50 ml of toluene, and the mixture was stirred for 1 h. Then, 3.0 g of TPI was added and the mixture was refluxed for 24 h. The white-brown solid was removed from the solvent by filtration, washed with toluene and acetone, and dried at room temperature. The pyridine-functionalized material, Al-SBA-15-TPI, was characterized by FT-IR spectroscopy, X-ray diffraction, thermal (TGA/DTA), and elemental (CNH) analysis. Elemental analysis found for pyridine functionalized Al-SBA-15: N, 3.18; C, 14.12; S, 0.0; H, 2.28%. Elemental and thermal analyses of Al-SBA-15-TPI sample gave pyridine concentration 1.14 mmol/g.

1 J. Hoogboom, P. M. L. Garcia, M. B. Otten, J. A. A. W. Elemans, J. Sly, S. V. Lazarenko, T. Rasing, A. E. Rowan and R. J. M. Nolte, *J. Am. Chem. Soc.*, 2005, **127**, 11047.

2 M. Pirouzmmand, M. M. Amini and N. Safari, *J. Colloid Interface Sci.*, 2008, **319**, 199.
